# Supplementary material for: The Use of Social Media for Preconception Information and Pregnancy Planning among Young Women
Source: MDPI journal article supplement (doi:10.3390/jcm10091892), 2021-04-27
Supplement: s1 [file s1]

## **File S1-SURVEY QUESTIONS**

### **Social media use for preconception and pregnancy information among young women of reproductive age**

**1. *What is your age in years?***

**2. *What is your level of education studied or currently studying?***

- Higher University Degree (e.g. Grad Dip, Masters, PhD)
- Bachelor Degree
- Advanced Diploma
- Certificate Level
- Year 12 or equivalent
- Did not finish Secondary School

**3. *What is your relationship status?***

- Married
- Partnered
- Single

**4. *What is your employment status?***

- Full Time
- Part Time
- Casual
- Not working

**5. *What is your annual individual income?***

- \$1-\$6,239 annually
- \$6,240-\$15,999 annually
- \$16,000-\$25,999 annually
- \$26,000-\$36,999 annually
- \$37,000-\$51,999 annually
- \$52,000 + annually
- I'd rather not answer
- No Income

**6. *Do you have or are you currently caring for children (e.g. as a parent or step parent)?***

- No
- Yes

**7. *Are you planning a pregnancy in the near future?***

- No,
  - If no, please specify why
- Yes, within the next 6-12 months
- Yes, within the next 12 months- 5 years

In this section, we explore information related to Social Media use.

**8. *Do you feel you have adequate knowledge about pregnancy from your past or current education?***

- Extremely adequate knowledge
- Somewhat adequate knowledge
- Neither adequate nor inadequate knowledge
- Somewhat inadequate knowledge
- Extremely inadequate knowledge

Please explain your reasoning for the above answer

**9. *Do you use a particular app or social media platform to gain information about your overall health?***

- No
- Yes

**10. Please indicate how often you use the following social media platforms/apps to gain information about you overall health**

***Instagram - overall health***

- Daily
- About once a week
- 2-3 times a week
- 4-6 times a week
- About once a month
- Never - I do not use Instagram for information about my overall health.

***Facebook - overall health***

- Daily
- About once a week
- 2-3 times a week
- 4-6 times a week
- About once a month
- Never - I do not use Facebook for information about my overall health.

***SnapChat Stories - overall health***

- Daily
- About once a week
- 2-3 times a week
- 4-6 times a week
- About once a month
- Never - I do not use SnapChat for information about my overall health.

***Twitter- overall health***

- Daily
- About once a week
- 2-3 times a week
- 4-6 times a week
- About once a month
- Never - I do not use Twitter for information about my overall health.

***Tumblr - overall health***

- Daily
- About once a week
- 2-3 times a week
- 4-6 times a week
- About once a month
- Never - I do not use Tumblr for information about my overall health.

***Other (please specify) - overall health***

- Daily
- About once a week
- 2-3 times a week
- 4-6 times a week
- About once a month

***11. Do you use social media platforms/ apps to seek preconception-health-related information?***

- Yes
- No

**12. Please indicate how often you use the following social media platforms/ apps to engage in preconception-health-related information**

***Instagram - preconception-health-related information***

- Daily
- About once a week
- 2-3 times a week
- 4-6 times a week
- About once a month
- Never - I do not use Instagram for information about preconception health.

***Facebook - preconception-health-related information***

- Daily
- About once a week
- 2-3 times a week
- 4-6 times a week
- About once a month
- Never - I do not use Facebook for information about preconception health.

***SnapChat Stories - preconception-health-related information***

- Daily
- About once a week
- 2-3 times a week
- 4-6 times a week
- About once a month
- Never - I do not use SnapChat for information about preconception health.

***Twitter - preconception-health-related information***

- Daily
- About once a week
- 2-3 times a week
- 4-6 times a week
- About once a month
- Never - I do not use Twitter for information about preconception health.

***Tumblr - preconception-health-related information***

- Daily
- About once a week
- 2-3 times a week
- 4-6 times a week
- About once a month
- Never - I do not use Tumblr for information about preconception health.

***Other (please specify) - preconception-health-related information***

- Daily
- About once a week
- 2-3 times a week
- 4-6 times a week
- About once a month

***13. Would you use social media platforms/apps to engage in preconception health-related information? (e.g in the future)***

- Yes
- No

***14. Which platforms you would use to seek preconception health-related information in the future?***

***15. Do you share preconception health-related information from social media pages with your peers?***

- Yes
- No

***16. Please describe in what situation you share preconception health-related information with your peers (e.g. sharing on Facebook, retweeting etc.).***

***17. Do you use social media platforms/ apps to engage in and seek pregnancy related information?***

- Yes
- No

***18. Please indicate how often you use the following social media platforms/ apps to seek pregnancy- related information***

***Instagram - pregnancy-health-related information***

- Daily
- About once a week
- 2-3 times a week
- 4-6 times a week
- About once a month
- Never - I do not use Instagram for information about pregnancy health.

***Facebook - pregnancy-health-related information***

- Daily
- About once a week

- 2-3 times a week
- 4-6 times a week
- About once a month
- Never - I do not use Facebook for information about pregnancy health.

***SnapChat Stories - pregnancy-health-related information***

- Daily
- About once a week
- 2-3 times a week
- 4-6 times a week
- About once a month
- Never - I do not use SnapChat for information about pregnancy health.

***Twitter - pregnancy-health-related information***

- Daily
- About once a week
- 2-3 times a week
- 4-6 times a week
- About once a month
- Never - I do not use Twitter for information about pregnancy health.

***Tumblr – pregnancy-health-related information***

- Daily
- About once a week
- 2-3 times a week
- 4-6 times a week
- About once a month
- Never - I do not use Tumblr for information about pregnancy health.

***Other (please specify) - pregnancy-health-related information***

- Daily
- About once a week
- 2-3 times a week
- 4-6 times a week
- About once a month

***19. Would you use social media platforms/apps to engage in pregnancy health-related information? (e.g in the future)***

- Yes
- No

***20. Which platforms you would use to seek pregnancy health-related information in the future?***

***21. Do you share pregnancy health-related information from social media pages with your peers?***

- Yes
- No

***22. Please describe in what situation you share pregnancy health-related information with your peers (e.g. sharing on Facebook, retweeting etc.).***
